# Supplementary material for: CircARHGAP12 suppresses cisplatin-induced alkaliptosis in nasopharyngeal carcinoma through G3BP1-mediated upregulation of CA9 in an RNA G-quadruplex-dependent manner
Source: Research Square preprint supplement (doi:10.21203/rs.3.rs-7984659/v1), 2025-12-05
Supplement: Supplementary file 1 [file 0e0147f4b206ad2dc06d3d5b.xlsx]

## Sheet: Sheet1
Primers used for PCR,RT-qPCR, siRNAs and probe
Primers for PCR	Forward(5'-3')	Reverse(5'-3')
circARHGAP12	CCCATCGATGTTTAAATGTGATACTGGTGTAGATCT	TAGCCGCGGCCTTATCTGTTCAGTGGAGC
Primers for qRT-PCR	Forward(5'-3')	Reverse(5'-3')
18S	TCTTAGCTGAGTGTCCCGCG	ATCATGGCCTCAGTTCCGAA
circARHGAP12	ATCTTGTGATTCCGCAGGAG	ATGGCTTTATGGCTTGTTGG
CA9	CAGTTGCTGTCTCGCTTGGA	CGGTGTAGTCAGAGACCCCT
GAPDH	TCAAGGCTGAGAACGGGAAG	CGCCCCACTTGATTTTGGAG
siRNA	Sense(5'-3')	Antisense(5'-3')
sicircARHGAP12	UGAACAGAUAAGGGUUUAA(dT)(dT)	UUAAACCCUUAUCUGUUCA(dT)(dT)
siCA9	CCUGAAGUUAGAGGAUCUA(dT)(dT)	UAGAUCCUCUAACUUCAGG(dT)(dT)
siG3BP1	GGGCUUCUCUCUAACAACA(dT)(dT)	UGUUGUUAGAGAGAAGCCC(dT)(dT)
siNONO	GCAUUCCUGAAGUCUCUAA(dT)(dT)	UUAGAGACUUCAGGAAUGC(dT)(dT)
siPTBP1	CCCUCAUUGACCUGCACAA(dT)(dT)	UUGUGCAGGUCAAUGAGGG(dT)(dT)
Probe for RNA pull-down & FISH	(5'-3')
circARHGAP12-Biotin	Biotin-GTATCACATTTAAACCCTTATCTGTTCAGT-Biotin
circARHGAP12-Digoxin	Digoxin-GTATCACATTTAAACCCTTATCTGTTCAGT-Digoxin
circARHGAP12-Cy3	Cy3-GTATCACATTTAAACCCTTATCTGTTCAGT-Cy3
CA9-Cy5	Cy5-GGTCTCCGTAGACTCCCCCTCGGCCATTGA-Cy5
