# Supplementary material for: CircARHGAP12 suppresses cisplatin-induced alkaliptosis in nasopharyngeal carcinoma through G3BP1-mediated upregulation of CA9 in an RNA G-quadruplex-dependent manner
Source: Research Square preprint supplement (doi:10.21203/rs.3.rs-7984659/v1), 2025-12-05
Supplement: Supplementary file 2 [file a760fa21d9b7705c076cdc35.xlsx]

## Sheet: Sheet1
Antibodies for western blotting, immunofluorescence,RNA-immunoprecipitation
Antibody	Catalog Number	Source
Anti-human GAPDH Mouse Monoclonal Antibody	60004-1-Ig	Proteintech
Anti-human CA9 Rabbit Polyclonal Antibody	11071-1-AP	Proteintech
Anti-human G3BP1 Mouse Monoclonal Antibody	66486-1-Ig	Proteintech
Anti-human NONO Rabbit Monoclonal Antibody	R25171	Zenbio
Anti-human PTBP1 Rabbit Monoclonal Antibody	M01798	Boster
Anti-Human DNA/RNA G-quadruplex[BG4] Monoclonal Antibody	Ab00174-24.1	Absolute Antibody
Goat Anti-Rabbit IgG Secondary Antibody HRP Conjugated	L3012	Signalway Antibody
Goat Anti-Mouse IgG Secondary Antibody HRP Conjugated	L3032	Signalway antibody
Goat anti-Mouse IgG (H+L) Cross-Adsorbed Secondary Antibody, Alexa Fluor 488	A-11001	Thermo Fisher Scientific
Goat anti-Mouse IgG (H+L) Cross-Adsorbed Secondary Antibody, Alexa Fluor 594	A-11032	Thermo Fisher Scientific
FITC Conjugated Rabbit Anti-Goat IgG polyclonal Antibody	HA1007	Huabio
