# Supplementary material for: CircARHGAP12 suppresses cisplatin-induced alkaliptosis in nasopharyngeal carcinoma through G3BP1-mediated upregulation of CA9 in an RNA G-quadruplex-dependent manner
Source: Research Square preprint supplement (doi:10.21203/rs.3.rs-7984659/v1), 2025-12-05
Supplement: Supplementary file 3 [file ba6e951e07544ee3c99ba50f.xlsx]

## Sheet: Sheet1
LC–MS/MS identified proteins pulled down by RNA pulldown
Protein	Score
PTBP1	1659
PCBP2	1524
NONO	875
IGF2BP3	793
HNRNPA1	764
PCBP1	722
G3BP1	654
IGF2BP1	566
HNRNPD	565
CAPRIN1	477
HNRNPAB	474
HNRNPA3	449
HNRNPA0	393
FAM120A	379
HNRNPL	371
KHDRBS1	370
PCBP3	348
SYNCRIP	346
ACTG2	344
G3BP2	338
GLUD1	305
